# Supplementary material for: Insight into the effect of alkyl chain length and substituent bulkiness on the mobility anisotropy of benzothieno[3,2-b][1]benzothiophenes
Source: Royal Society of Chemistry journal article supplement (doi:10.1039/d2tc03721a), 2022-01-01
Supplement: d2tc03721a1.pdf [file d2tc03721a1.pdf]

## Supporting Information

### **Insight Into the Alkyl Chain Length and Substituent Bulkiness on the Mobility Anisotropy of Benzothieno[3,2-b][1]benzothiophenes**

*Dongwei Zhang,<sup>1,2\*</sup> Liguo Zhou,<sup>1</sup> Ping Kwan Johnny Wong,<sup>1</sup> and Wen Zhang<sup>1</sup>*

<sup>1</sup>School of Microelectronics, Northwestern Polytechnical University, Chang'an Campus, Dongxiang Road, Chang'an District, Xi'an, Shaanxi, 710129, China

<sup>2</sup>Yangtze River Delta Research Institute of NPU, Taicang, No. 27 Zigang Road, Science and Education New Town, Taicang, Jiangsu, 215400, China

\*Corresponding authors (E-mail: zhangdw@nwpu.edu.cn)

Table S1. The calculated mobility anisotropic ratio and other related parameters of the unsubstituted and other alkylated BTBTs.

| # | Name       | Chemical Structure | i              | $r_i$<br>(Å) | $\theta_i$<br>(°) | $V_i$<br>(meV) | $\lambda$<br>(eV) | $\mu_{\max}/\mu_{\min}$ | Theoretical<br>$\mu$<br>( $\text{cm}^2\text{V}^{-1}\text{s}^{-1}$ ) |
|---|------------|--------------------|----------------|--------------|-------------------|----------------|-------------------|-------------------------|---------------------------------------------------------------------|
| 1 | BTBT       |                    | P <sub>1</sub> | 5.862        | 0                 | 59.3           | 0.156             | 113.36                  | 0.016-1.831                                                         |
|   |            |                    | T <sub>1</sub> | 4.932        | 53.54             | 18.6           |                   |                         |                                                                     |
|   |            |                    | T <sub>2</sub> | 4.932        | 126.46            | 18.6           |                   |                         |                                                                     |
|   |            |                    | P <sub>2</sub> | 5.862        | 180               | 59.3           |                   |                         |                                                                     |
|   |            |                    | T <sub>3</sub> | 4.932        | 233.54            | 18.6           |                   |                         |                                                                     |
|   |            |                    | T <sub>4</sub> | 4.932        | 306.46            | 18.6           |                   |                         |                                                                     |
| 2 | di-C2-BTBT |                    | P <sub>1</sub> | 7.827        | 0                 | 49.5           | 0.182             | 19920.18                | 0.000-1.911                                                         |
|   |            |                    | T <sub>1</sub> | 5.719        | 46.82             | 4.8            |                   |                         |                                                                     |
|   |            |                    | T <sub>2</sub> | 5.719        | 133.18            | 4.8            |                   |                         |                                                                     |
|   |            |                    | P <sub>2</sub> | 7.827        | 180               | 49.5           |                   |                         |                                                                     |
|   |            |                    | T <sub>3</sub> | 5.719        | 226.82            | 4.8            |                   |                         |                                                                     |
|   |            |                    | T <sub>4</sub> | 5.719        | 313.18            | 4.8            |                   |                         |                                                                     |
| 3 | di-C3-BTBT |                    | P <sub>1</sub> | 4.683        | 0                 | 3.5            | 0.182             | 44.39                   | 0.002-0.087                                                         |
|   |            |                    | T <sub>1</sub> | 7.453        | 95.64             | 12.2           |                   |                         |                                                                     |
|   |            |                    | T <sub>2</sub> | 9.183        | 126.13            | 6.0            |                   |                         |                                                                     |
|   |            |                    | P <sub>2</sub> | 4.683        | 180               | 3.5            |                   |                         |                                                                     |
|   |            |                    | T <sub>3</sub> | 7.453        | 275.64            | 12.2           |                   |                         |                                                                     |
|   |            |                    | T <sub>4</sub> | 9.183        | 306.13            | 6.0            |                   |                         |                                                                     |

| # | Name       | Chemical Structure                                                                  | i              | $r_i$<br>(Å) | $\theta_i$<br>(°) | $V_i$<br>(meV) | $\lambda$<br>(eV) | $\mu_{\max}/\mu_{\min}$ | Theoretical<br>$\mu$<br>( $\text{cm}^2\text{V}^{-1}\text{s}^{-1}$ ) |
|---|------------|-------------------------------------------------------------------------------------|----------------|--------------|-------------------|----------------|-------------------|-------------------------|---------------------------------------------------------------------|
| 4 | di-C4-BTBT | 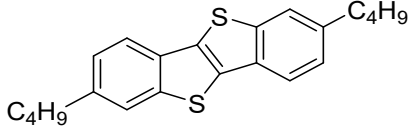   | P <sub>1</sub> | 4.642        | 0                 | 1.9            | 0.184             | 17.94                   | 0.002-0.027                                                         |
|   |            |                                                                                     | T <sub>1</sub> | 7.652        | 95.75             | 5.1            |                   |                         |                                                                     |
|   |            |                                                                                     | T <sub>2</sub> | 9.339        | 125.39            | 5.8            |                   |                         |                                                                     |
|   |            |                                                                                     | P <sub>2</sub> | 4.642        | 180               | 1.9            |                   |                         |                                                                     |
|   |            |                                                                                     | T <sub>3</sub> | 7.652        | 275.75            | 5.1            |                   |                         |                                                                     |
|   |            |                                                                                     | T <sub>4</sub> | 9.339        | 305.39            | 5.8            |                   |                         |                                                                     |
| 5 | di-C5-BTBT |    | P <sub>1</sub> | 4.760        | 0                 | 9.3            | 0.186             | 13.38                   | 0.008-0.103                                                         |
|   |            |                                                                                     | T <sub>1</sub> | 8.681        | 102.31            | 12.9           |                   |                         |                                                                     |
|   |            |                                                                                     | T <sub>2</sub> | 10.753       | 127.93            | 2.2            |                   |                         |                                                                     |
|   |            |                                                                                     | P <sub>2</sub> | 4.760        | 180               | 9.3            |                   |                         |                                                                     |
|   |            |                                                                                     | T <sub>3</sub> | 8.681        | 282.31            | 12.9           |                   |                         |                                                                     |
|   |            |                                                                                     | T <sub>4</sub> | 10.753       | 307.93            | 2.2            |                   |                         |                                                                     |
| 6 | di-C8-BTBT |  | P <sub>1</sub> | 5.927        | 0                 | 42.4           | 0.180             | 155.25                  | 0.005-0.724                                                         |
|   |            |                                                                                     | T <sub>1</sub> | 4.930        | 53.05             | 12.4           |                   |                         |                                                                     |
|   |            |                                                                                     | T <sub>2</sub> | 4.930        | 126.95            | 12.4           |                   |                         |                                                                     |
|   |            |                                                                                     | P <sub>2</sub> | 5.927        | 180               | 42.4           |                   |                         |                                                                     |
|   |            |                                                                                     | T <sub>3</sub> | 4.930        | 233.05            | 12.4           |                   |                         |                                                                     |
|   |            |                                                                                     | T <sub>4</sub> | 4.930        | 306.95            | 12.4           |                   |                         |                                                                     |

| # | Name        | Chemical Structure                                                                | i              | $r_i$<br>(Å) | $\theta_i$<br>(°) | $V_i$<br>(meV) | $\lambda$<br>(eV) | $\mu_{\max}/\mu_{\min}$ | Theoretical<br>$\mu$<br>( $\text{cm}^2\text{V}^{-1}\text{s}^{-1}$ ) |
|---|-------------|-----------------------------------------------------------------------------------|----------------|--------------|-------------------|----------------|-------------------|-------------------------|---------------------------------------------------------------------|
| 7 | di-C10-BTBT | 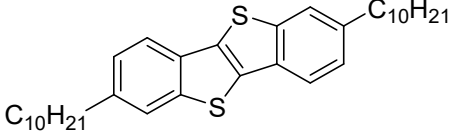 | P <sub>1</sub> | 5.923        | 0                 | 49.4           | 0.172             | 10.88                   | 0.074-0.804                                                         |
|   |             |                                                                                   | T <sub>1</sub> | 4.912        | 52.92             | 28.5           |                   |                         |                                                                     |
|   |             |                                                                                   | T <sub>2</sub> | 4.912        | 127.08            | 28.5           |                   |                         |                                                                     |
|   |             |                                                                                   | P <sub>2</sub> | 5.923        | 180               | 49.4           |                   |                         |                                                                     |
|   |             |                                                                                   | T <sub>3</sub> | 4.912        | 232.92            | 28.5           |                   |                         |                                                                     |
|   |             |                                                                                   | T <sub>4</sub> | 4.912        | 307.08            | 28.5           |                   |                         |                                                                     |
| 8 | di-C12-BTBT |  | P <sub>1</sub> | 5.864        | 0                 | 58.0           | 0.158             | 3.92                    | 0.283-1.109                                                         |
|   |             |                                                                                   | T <sub>1</sub> | 4.855        | 52.85             | 44.4           |                   |                         |                                                                     |
|   |             |                                                                                   | T <sub>2</sub> | 4.855        | 127.15            | 44.4           |                   |                         |                                                                     |
|   |             |                                                                                   | P <sub>2</sub> | 5.864        | 180               | 58.0           |                   |                         |                                                                     |
|   |             |                                                                                   | T <sub>3</sub> | 4.855        | 232.85            | 44.4           |                   |                         |                                                                     |
|   |             |                                                                                   | T <sub>4</sub> | 4.855        | 307.15            | 44.4           |                   |                         |                                                                     |

Table S2. The calculated mobility anisotropic ratio and other related parameters of the bulky end-capped BTBTs

| #  | Name          | -R=                                                                                 | i              | $r_i$<br>(Å) | $\theta_i$<br>(°) | $V_i$<br>(meV) | $\lambda$<br>(eV) | $\mu_{\max}/\mu_{\min}$ | Theoretical<br>$\mu$<br>( $\text{cm}^2\text{V}^{-1}\text{s}^{-1}$ ) |
|----|---------------|-------------------------------------------------------------------------------------|----------------|--------------|-------------------|----------------|-------------------|-------------------------|---------------------------------------------------------------------|
| 9  | diiPr-BTBT    | 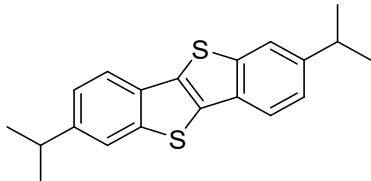   | P <sub>1</sub> | 6.242        | 0                 | 63.8           | 0.189             | 6.52                    | 0.189-1.231                                                         |
|    |               |                                                                                     | T <sub>1</sub> | 6.651        | 62.01             | 35.0           |                   |                         |                                                                     |
|    |               |                                                                                     | T <sub>2</sub> | 6.651        | 117.99            | 35.0           |                   |                         |                                                                     |
|    |               |                                                                                     | P <sub>2</sub> | 6.242        | 180               | 63.8           |                   |                         |                                                                     |
|    |               |                                                                                     | T <sub>3</sub> | 6.651        | 242.01            | 35.0           |                   |                         |                                                                     |
|    |               |                                                                                     | T <sub>4</sub> | 6.651        | 297.99            | 35.0           |                   |                         |                                                                     |
| 10 | ditBu-BTBT    |    | P <sub>1</sub> | 6.044        | 0                 | 60.4           | 0.209             | 1.40                    | 0.450-0.630                                                         |
|    |               |                                                                                     | T <sub>1</sub> | 6.081        | 60.20             | 53.4           |                   |                         |                                                                     |
|    |               |                                                                                     | T <sub>2</sub> | 6.081        | 119.80            | 53.4           |                   |                         |                                                                     |
|    |               |                                                                                     | P <sub>2</sub> | 6.044        | 180               | 60.4           |                   |                         |                                                                     |
|    |               |                                                                                     | T <sub>3</sub> | 6.081        | 240.20            | 53.4           |                   |                         |                                                                     |
|    |               |                                                                                     | T <sub>4</sub> | 6.081        | 299.80            | 53.4           |                   |                         |                                                                     |
| 11 | ditBu-BTBT-LT |  | P <sub>1</sub> | 6.155        | 0                 | 54.0           | 0.208             | 1.61                    | 0.333-0.537                                                         |
|    |               |                                                                                     | T <sub>1</sub> | 6.150        | 59.97             | 45.9           |                   |                         |                                                                     |
|    |               |                                                                                     | T <sub>2</sub> | 6.150        | 120.03            | 45.9           |                   |                         |                                                                     |
|    |               |                                                                                     | P <sub>2</sub> | 6.155        | 180               | 54.0           |                   |                         |                                                                     |
|    |               |                                                                                     | T <sub>3</sub> | 6.150        | 239.97            | 45.9           |                   |                         |                                                                     |
|    |               |                                                                                     | T <sub>4</sub> | 6.150        | 300.03            | 45.9           |                   |                         |                                                                     |

| #  | Name                            | -R=                                                                                 | i              | $r_i$<br>(Å) | $\theta_i$<br>(°) | $V_i$<br>(meV) | $\lambda$<br>(eV) | $\mu_{\max}/\mu_{\min}$ | Theoretical<br>$\mu$<br>( $\text{cm}^2\text{V}^{-1}\text{s}^{-1}$ ) |
|----|---------------------------------|-------------------------------------------------------------------------------------|----------------|--------------|-------------------|----------------|-------------------|-------------------------|---------------------------------------------------------------------|
| 12 | ditBu-BTBT-<br>HT               | 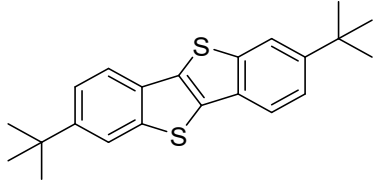   | P <sub>1</sub> | 6.326        | 0                 | 53.0           | 0.164             | 3.87                    | 0.275-1.065                                                         |
|    |                                 |                                                                                     | T <sub>1</sub> | 6.094        | 58.73             | 35.9           |                   |                         |                                                                     |
|    |                                 |                                                                                     | T <sub>2</sub> | 6.094        | 121.27            | 35.9           |                   |                         |                                                                     |
|    |                                 |                                                                                     | P <sub>2</sub> | 6.326        | 180               | 53.0           |                   |                         |                                                                     |
|    |                                 |                                                                                     | T <sub>3</sub> | 6.094        | 238.73            | 35.9           |                   |                         |                                                                     |
|    |                                 |                                                                                     | T <sub>4</sub> | 6.094        | 301.27            | 35.9           |                   |                         |                                                                     |
| 13 | diTMS-<br>BTBT $\alpha$<br>form |    | P <sub>1</sub> | 10.1         | 0                 | 2.2            | 0.212             | 2.59                    | 0.126-0.328                                                         |
|    |                                 |                                                                                     | T <sub>1</sub> | 6.382        | 36.24             | 31.5           |                   |                         |                                                                     |
|    |                                 |                                                                                     | T <sub>2</sub> | 6.225        | 142.70            | 38.4           |                   |                         |                                                                     |
|    |                                 |                                                                                     | P <sub>2</sub> | 10.1         | 180               | 2.2            |                   |                         |                                                                     |
|    |                                 |                                                                                     | T <sub>3</sub> | 6.382        | 216.24            | 31.5           |                   |                         |                                                                     |
|    |                                 |                                                                                     | T <sub>4</sub> | 6.225        | 322.70            | 38.4           |                   |                         |                                                                     |
| 14 | diTMS-<br>BTBT $\beta$<br>form  |  | P <sub>1</sub> | 6.346        | 0                 | 48.2           | 0.215             | 2.64                    | 0.173-0.456                                                         |
|    |                                 |                                                                                     | T <sub>1</sub> | 6.505        | 60.81             | 34.7           |                   |                         |                                                                     |
|    |                                 |                                                                                     | T <sub>2</sub> | 6.505        | 119.19            | 34.7           |                   |                         |                                                                     |
|    |                                 |                                                                                     | P <sub>2</sub> | 6.346        | 180               | 48.2           |                   |                         |                                                                     |
|    |                                 |                                                                                     | T <sub>3</sub> | 6.505        | 240.81            | 34.7           |                   |                         |                                                                     |
|    |                                 |                                                                                     | T <sub>4</sub> | 6.505        | 299.19            | 34.7           |                   |                         |                                                                     |

Table S3. The dominant intermolecular interactions of the alkyl and bulky end-capped BTBTs.

| Compounds                | S···S interactions | S···C interactions | C···H interactions |
|--------------------------|--------------------|--------------------|--------------------|
| BTBT                     | 3.2                | 16.5               | 35.6               |
| di-C2-BTBT               | 0.1                | 11.6               | 25.9               |
| di-C3-BTBT               | 1                  | 3.0                | 10.0               |
| di-C4-BTBT               | 0.5                | 2.8                | 8.6                |
| di-C5-BTBT               | 0                  | 2.6                | 8.1                |
| di-C8-BTBT               | 2.1                | 6.6                | 14.6               |
| di-C10-BTBT              | 1.8                | 5.8                | 13.0               |
| di-C12-BTBT              | 1.6                | 5.1                | 11.6               |
| diiPr-BTBT               | 3.3                | 7.1                | 24.3               |
| ditBu-BTBT               | 1.1                | 5.9                | 22.9               |
| ditBu-BTBT-LT            | 1.1                | 5.5                | 22.8               |
| ditBu-BTBT-HT            | 0.7                | 5.3                | 21.9               |
| diTMS-BTBT $\alpha$ form | 0                  | 3.6                | 22.2               |
| diTMS-BTBT $\beta$ form  | 1.1                | 4.6                | 23.7               |

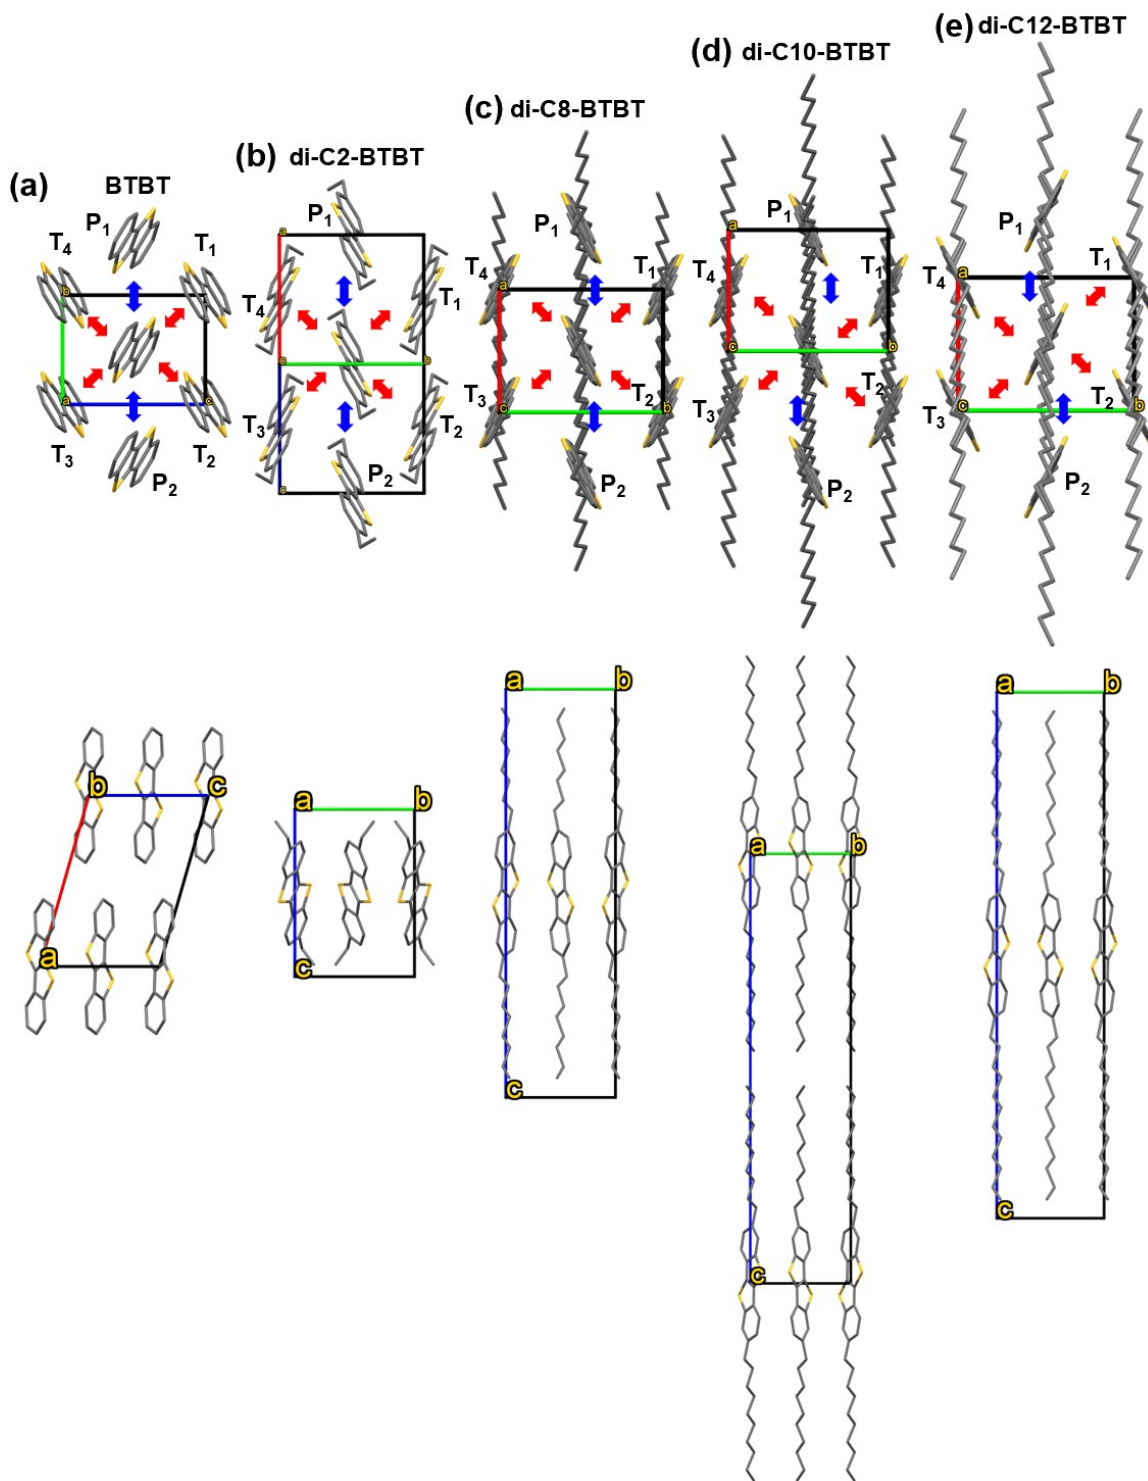

Figure S1. The LHB packing structures of (a) BTBT, (b) di-C2-BTBT, (c) di-C8-BTBT, (d) di-C10-BTBT, and (e) di-C12-BTBT.



(a) di-C3-BTBT

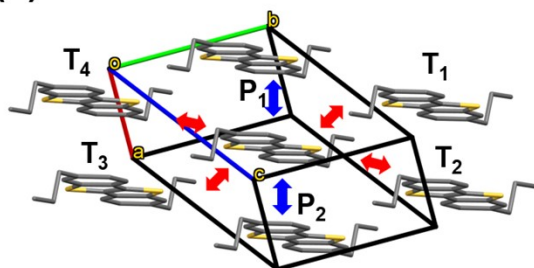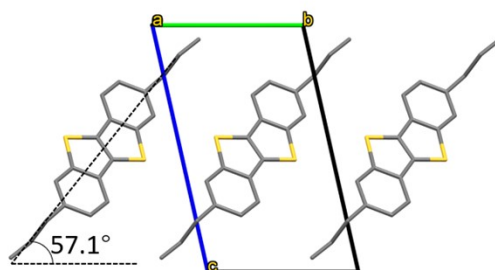

(b) di-C4-BTBT

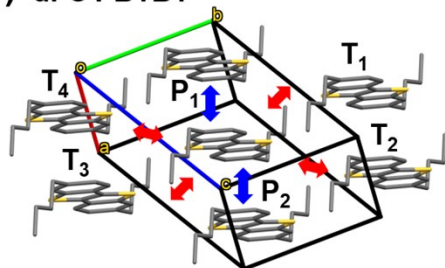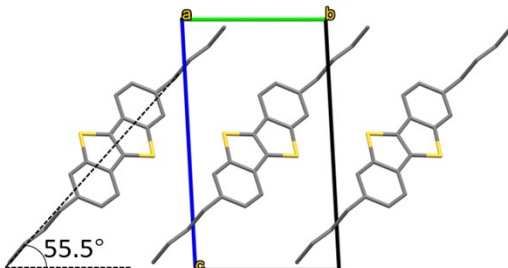

(c) di-C5-BTBT

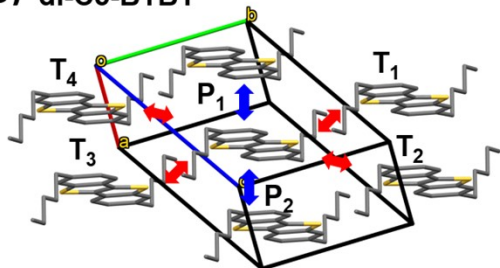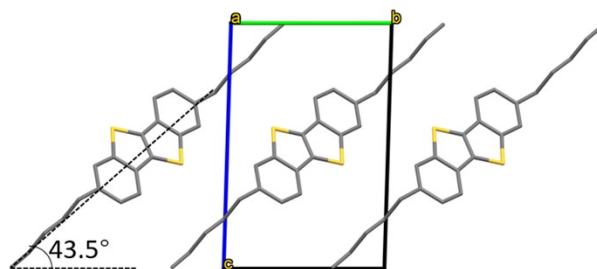

Figure S2. The lamellar packing structures of (a) di-C3-BTBT, (b) di-C4-BTBT, and (c) di-C5-BTBT.

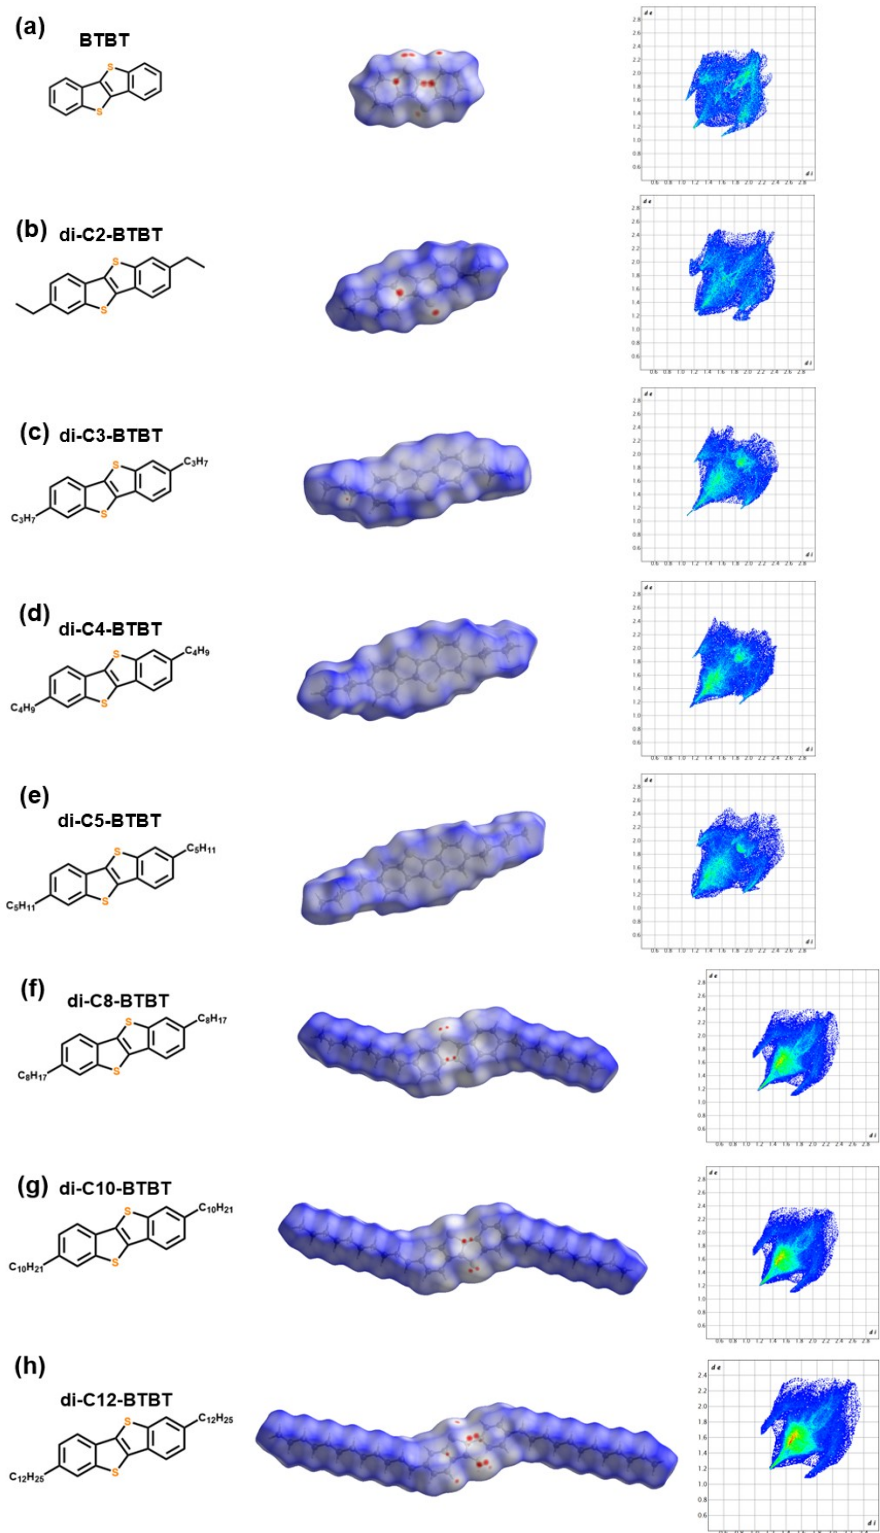

Figure S3. The Hirshfeld surfaces and fingerprint plots of (a) BTBT, (b) di-C2-BTBT, (c) di-C3-BTBT, (d) di-C4-BTBT, (e) di-C5-BTBT, (f) di-C8-BTBT, (g) di-C10-BTBT, and (h) di-C12-BTBT.

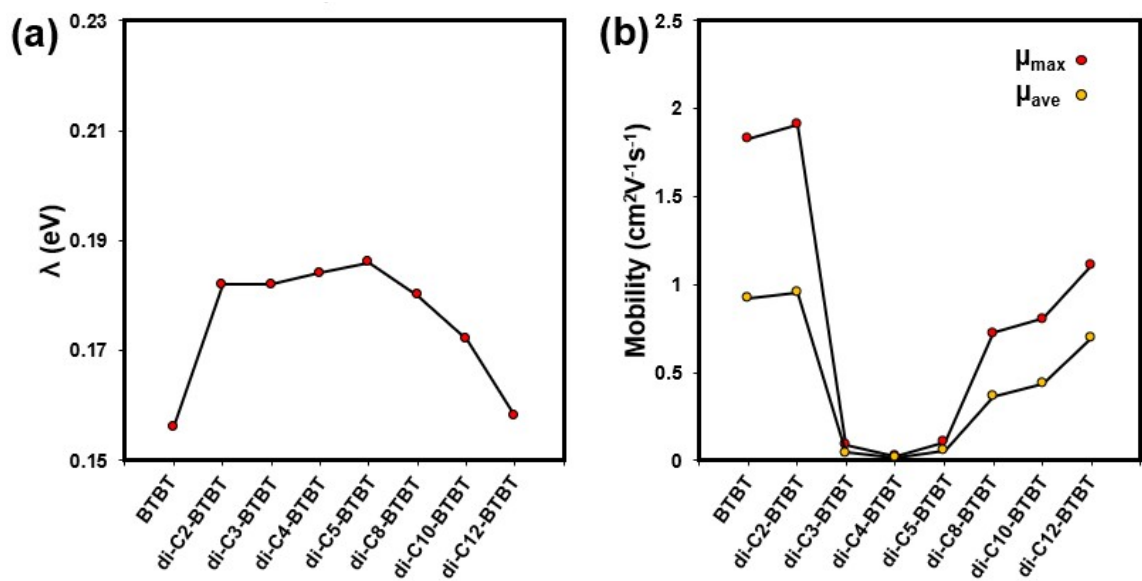

Figure S4. The calculated (a) reorganization energies and (b) maximum and average mobilities of the unsubstituted BTBT and other alkylated BTBTs.

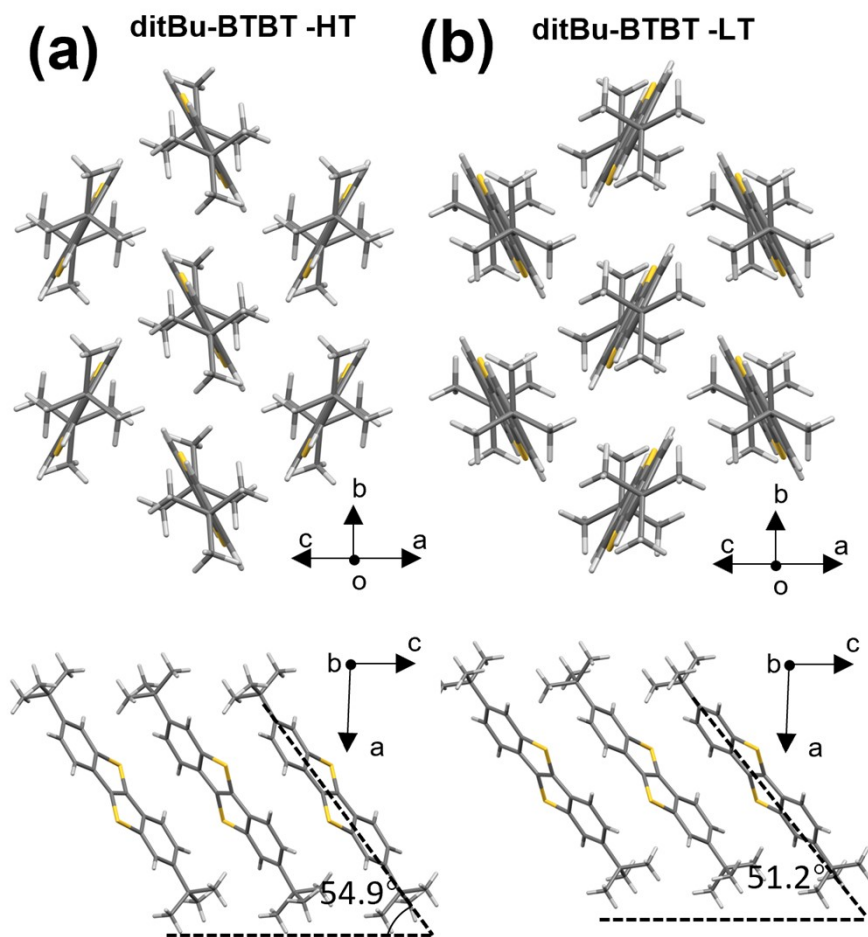

Figure S5. The molecular packing structures of (a) ditBu-BTBT-HT and (b) ditBu-BTBT-LT.

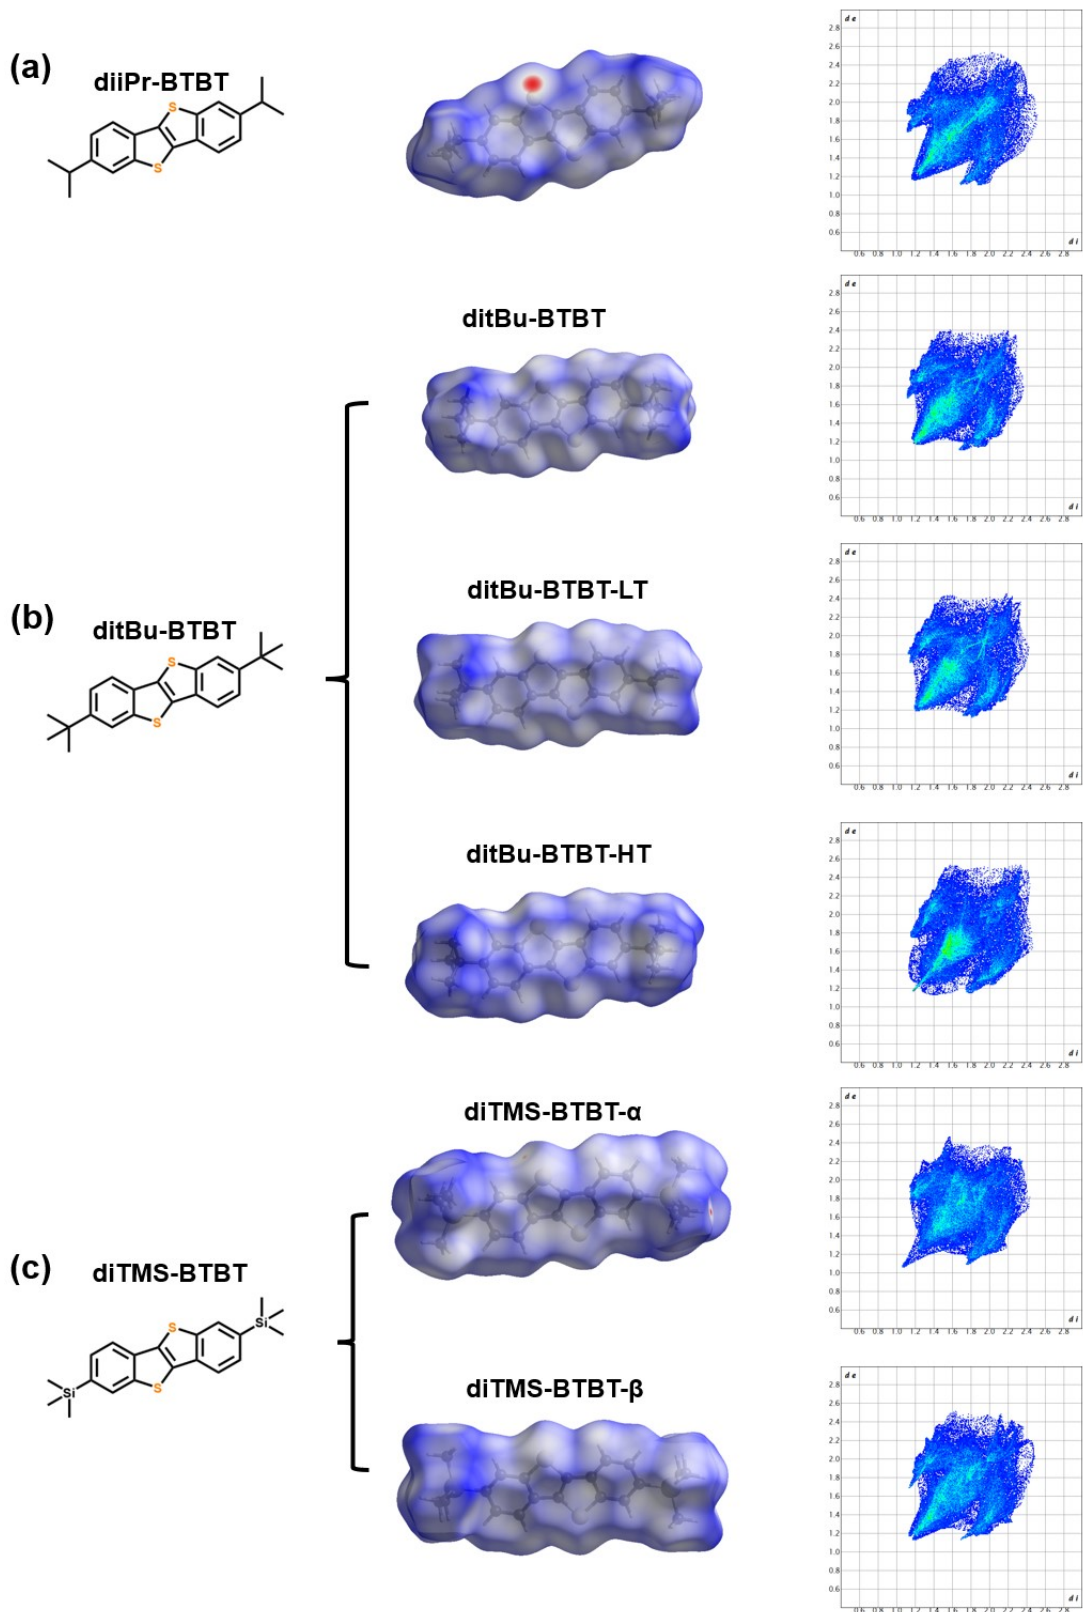

Figure S6. The Hirshfeld surfaces and fingerprint plots of (a) diiPr-BTBT, (b) ditBu-BTBTs (including LT and HT forms), and (c) diTMS-BTBTs ( $\alpha$  and  $\beta$  forms).

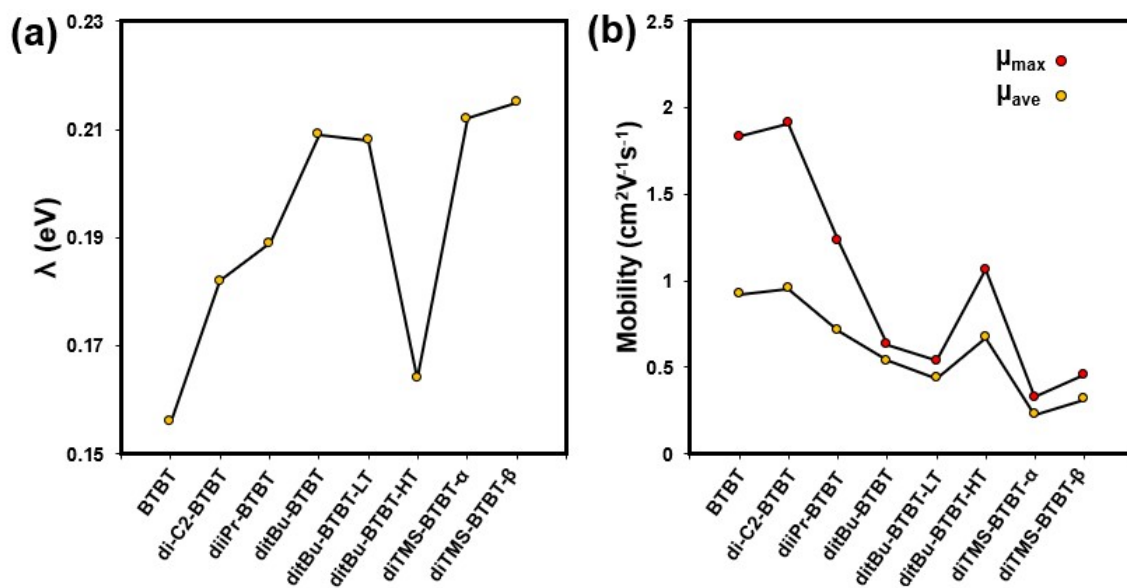

Figure S7. The calculated (a) reorganization energies and (b) maximum and average mobilities of the bulky end-capped BTBTs.

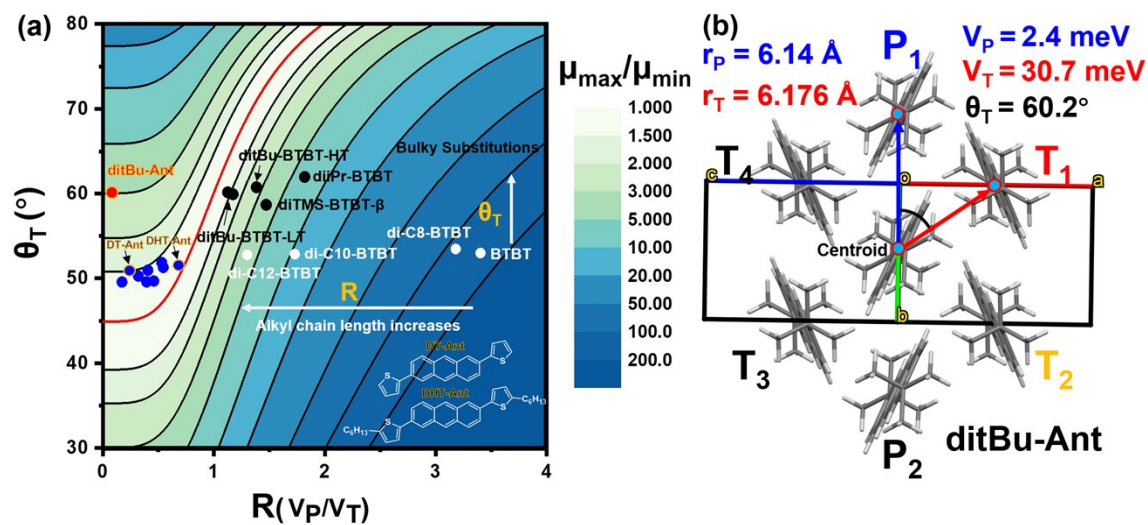

Figure S8. (a) the contour map including the alkyl and bulky end-capped BTBTs and 2,6-Ants; (b) The molecular packing structure and intermolecular transfer integrals of ditBu-Ant.

## Theoretical Methodology

In Wen's model, the charge-transfer along a specific transistor channel could be calculated by considering the relative hopping probability of various dimers to the channel, as shown in Figure 1. The transfer mobility  $\mu(\varphi)$  can be defined as below:

$$\mu(\varphi) = \sum_i \mu_i \cos^2 \gamma_i \cos^2 (\theta_i - \varphi) \quad (1)$$

where  $\varphi$  is the angle between the transistor channel and the reference axis ( $P_1$  direction in Figure 1),  $i$  represents a specific hopping path with individual mobility  $\mu_i$ ,  $\theta_i$  is the angles of the projected hopping path of dimers relative to the reference axis, and  $\gamma_i$  is the angle between the charge hopping path and the plane of interest.

To further understand the mobility anisotropy in relation to the molecular packing architecture parameters and the electronic coupling, we develop a theoretical model based on the Wen's model, which is specific for predicting the mobility anisotropic ratio ( $\mu_{max}/\mu_{min}$ ). In this model, we must simplify the equ. (1) to a lower order, as below:

$$\mu(\varphi) = \sum_i \frac{1}{2} \mu_i \cos^2 \gamma_i [1 + \cos (2\theta_i - 2\varphi)] \quad (2)$$

This equation can be further simplified as:

$$\mu(\varphi) = A \cos 2\varphi + B \sin 2\varphi + C \quad (3)$$

Herein, the factors  $A$ ,  $B$  and  $C$  are:

$$A = \frac{1}{2} \sum_i \mu_i \cos^2 \gamma_i \cos 2\theta_i \quad (4)$$

$$B = \frac{1}{2} \sum_i \mu_i \cos^2 \gamma_i \sin 2\theta_i \quad (5)$$

$$C = \frac{1}{2} \sum_i \mu_i \cos^2 \gamma_i \quad (6)$$

Thereby, the analytic functions to determine the maximum and minimum mobilities for any type of OSCs can be derived as:

$$\mu_{max} = C + \sqrt{A^2 + B^2} \quad (7)$$

$$\mu_{min} = C - \sqrt{A^2 + B^2} \quad (8)$$

Based on the above model, the mobility anisotropy ratio ( $\mu_{max}/\mu_{min}$ ) can be directly calculated from the molecular packing architecture parameters and the electronic property parameters for any types of OSCs. Meanwhile, the factor  $A$  and  $B$  are require to approach zero as close as possible if the OSCs would like to achieve low-anisotropy in mobility. Moreover, the mobility anisotropic ratio is strongly depending on the balance of the transfer integral ( $V$ ) of the nearest neighbour contacts. Unbalanced transfer integrals can



cause an extremely large mobility along a direction with strong electronic coupling, significantly raise the value of factor  $A$  or  $B$ , and then lead to large anisotropic ratio.

It is worth to mention that the OSCs exhibit the LHB-ISs, which can satisfy a specific condition of  $V_{T1} = V_{T2}$ ,  $r_{T1} = r_{T2}$ , and  $\theta_{T1} = \pi - \theta_{T2}$  (Figure 1). Herein,  $V_{T1}$  and  $V_{T2}$  represent the transfer integrals between neighbor dimers along the directions of  $T_1$  and  $T_2$  with hopping distances of  $r_{T1}$  and  $r_{T2}$ , respectively. Under this specific condition, the equivalent hopping paths of  $T_1$  and  $T_2$  can be simplified as  $T$ , and the transfer integrals of  $V_{T1}$  and  $V_{T2}$  and the angles of  $\theta_{T1}$  and  $\theta_{T2}$  can also be simplified as  $V_T$  and  $\theta_T$ . In addition, the charge hopping paths are in the plane of interest, indicating that the angle  $\gamma_i$  is equal to 0. Thereby, we only require to consider the charge mobilities of  $\mu_P$  and  $\mu_T$  at parallel and transverse directions, which could be derived from  $V_P$ ,  $V_T$ , and  $\theta_T$  as below:

$$\frac{\mu_P}{\mu_T} = (V_P/V_T)^4 (r_P/r_T)^2 = (R)^4 (2\cos \theta_T)^2 \quad (9)$$

where  $V_P$  and  $V_T$  are the transfer integrals at the parallel and transverse contacts with hopping distances of  $r_P$  and  $r_T$ , respectively.  $R$  is the ratio between  $V_P$  and  $V_T$  ( $R \equiv V_P/V_T$ ).

Moreover, the LHB-IS directly causes that the factor  $B$  equal to 0. Hence, the factors  $A$ ,  $B$  and  $C$  could be simplify as;

$$A = \mu_T [R^4 (2\cos \theta_T)^2 + 2\cos 2\theta_T] \quad (10)$$

$$B = 0 \quad (11)$$

$$C = \mu_T [R^4 (2\cos \theta_T)^2 + 2] \quad (12)$$

A function of  $f(R, \theta_T)$  specific for insight evaluating the mobility anisotropic ratio in relation to the transfer integral and the angle  $\theta_T$  could be derived from eq. (7) and (8) and shown as below:

$$\begin{aligned} \frac{\mu_{max}}{\mu_{min}} &= \frac{C + |A|}{C - |A|} = f(R, \theta_T) \\ &= \frac{R^4 (2\cos \theta_T)^2 + 2 + |R^4 (2\cos \theta_T)^2 + 2\cos 2\theta_T|}{R^4 (2\cos \theta_T)^2 + 2 - |R^4 (2\cos \theta_T)^2 + 2\cos 2\theta_T|} \end{aligned} \quad (13)$$

For calculation of the reorganization energy ( $\lambda$ ), adiabatic potential energy surfaces method was applied, which could be described with the following equation,

$$\lambda = (E_0^* - E_0) + (E_+^* - E_+) \quad (14)$$

where  $E_0$  and  $E_+$  represent the energies of the neutral and cationic species in their lowest-energy geometries, respectively;  $E_0^*$  is the energy of neutral state with the geometry of the cationic species, and  $E_+^*$  is the energy of the cationic state with the geometry of the neutral species. All geometric optimizations and energy evaluations in the process were conducted with Amsterdam

Modeling Suite (AMS) using PW91 functional (GGA:PW91) and the basis set of triple-Z 2 plus polarization functions (TZ2P).

The transfer integral of each dimer ( $V_i$ ) was calculated from the corresponding spatial overlap ( $S_{RP}$ ), charge transfer integral ( $J_{RP}$ ), site energies ( $H_{RR}$ ,  $H_{RP}$ ) of the dimer,

$$V_i = \frac{J_{RP} - S_{RP}(H_{RR} + H_{RP})/2}{1 - S_{RP}^2} \quad (15)$$

Assuming that the Kohn-Sham Hamiltonian of the dimer system ( $h_{ks}$ ) is consists of two monomers. The  $\varphi_{HOMO}^{C1}$  and  $\varphi_{HOMO}^{C2}$  represent the highest occupied molecular orbitals (HOMO) of two monomers. The required essential parameters ( $S_{RP}$ ,  $J_{RP}$ ,  $H_{RR}$ , and  $H_{RP}$ ) for the calculation of the transfer integral ( $V_i$ ) of OSCs can be obtained by

$$J_{RP} = \langle \varphi_{HOMO}^{C1} | h_{ks} | \varphi_{HOMO}^{C2} \rangle$$

$$S_{RP} = \langle \varphi_{HOMO}^{C1} | \varphi_{HOMO}^{C2} \rangle$$

$$H_{RR} = \langle \varphi_{HOMO}^{C1} | h_{ks} | \varphi_{HOMO}^{C1} \rangle \quad (16)$$

$$H_{PP} = \langle \varphi_{HOMO}^{C2} | h_{ks} | \varphi_{HOMO}^{C2} \rangle$$

When the AMS calculation is completed, the corresponding results of the spatial overlap ( $S_{RP}$ ), charge transfer integral ( $J_{RP}$ ), site energies ( $H_{RR}$ ,  $H_{RP}$ ) and hole transfer integral can be directly obtained in the output file of AMS software.
